# Supplementary material for: Ratio abstraction over discrete magnitudes by newly hatched domestic chicks (Gallus gallus)
Source: PubMed Central journal article supplement (PMC4964567; doi:10.1038/srep30114), 2016-07-28
Supplement: srep30114-s1.pdf [file srep30114-s1.pdf]

## Supplementary Information

Ratio abstraction over discrete magnitudes by newly hatched domestic chicks (*Gallus gallus*)

Rosa Rugani, Koleen McCrink, Maria-Dolores de Hevia, Giorgio Vallortigara, Lucia Regolin

**Supplementary Table S1**

| Subject | Number of training trials to learning criterion | Correct responses (%) in all 20 testing trials | Correct responses (%) in the first 5 trials | First trial (C= correct I= incorrect) |
|---------|-------------------------------------------------|------------------------------------------------|---------------------------------------------|---------------------------------------|
| 1       | 42                                              | 60                                             | 60                                          | C                                     |
| 2       | 53                                              | 65                                             | 80                                          | C                                     |
| 3       | 20                                              | 80                                             | 80                                          | C                                     |
| 4       | 78                                              | 63.158*                                        | 80                                          | C                                     |
| 5       | 75                                              | 85                                             | 80                                          | C                                     |
| 6       | 81                                              | 90                                             | 100                                         | C                                     |
| 7       | 68                                              | 80                                             | 100                                         | C                                     |
| 8       | 104                                             | 90                                             | 80                                          | C                                     |
| 9       | 42                                              | 73.684*                                        | 80                                          | C                                     |
| 10      | 68                                              | 85                                             | 60                                          | C                                     |

**Table S1.** Data of Experiment 1. The total number of trials needed during training to reach the learning criterion, the correct number of valid trial in overall test, the number of correct responses emitted by each chick in the first five testing trials and the data of the very first trial were reported. For each chick were computed the percentage of correct responses by dividing the number of correct responses by the total number of valid trial.

\* Because the chicks' performance was scored off-line by a coder naïve to the hypotheses of the study, for subjects number 4 and 9 one testing trial was not clearly detectable on the videos and therefore for these two subjects total number of valid trials was 19. For these two subjects we calculated the number of correct trials and the percentages were computed as:  $(\text{Number of Correct Choices} / 19) \times 100$ .

**Supplementary Table S2.**

| Subject | Number of training trials to learning criterion | Correct responses (%) in all 20 testing trials | Correct responses (%) in the first 5 trials | First trial (C= correct I= incorrect) |
|---------|-------------------------------------------------|------------------------------------------------|---------------------------------------------|---------------------------------------|
| 1       | 102                                             | 75                                             | 80                                          | I                                     |
| 2       | 186                                             | 65                                             | 80                                          | I                                     |
| 3       | 172                                             | 70                                             | 60                                          | C                                     |
| 4       | 121                                             | 75                                             | 60                                          | C                                     |
| 5       | 49                                              | 70                                             | 60                                          | C                                     |
| 6       | 126                                             | 80                                             | 100                                         | C                                     |
| 7       | 123                                             | 75                                             | 80                                          | C                                     |
| 8       | 20                                              | 70                                             | 60                                          | C                                     |
| 9       | 28                                              | 60                                             | 60                                          | C                                     |
| 10      | 144                                             | 70                                             | 80                                          | I                                     |
| 11      | 114                                             | 45                                             | 40                                          | C                                     |
| 12      | 30                                              | 70                                             | 60                                          | C                                     |

**Table S1.** Data of Experiment 2. The total number of trials needed during training to reach the learning criterion, the correct number of valid trial in overall test, the number of correct responses emitted by each chick in the first five testing trials and the data of the very first trial were reported.
